# Supplementary material for: Heterogeneous Double Metal Cyanide Catalyzed Synthesis of Poly(ε-caprolactone) Polyols for the Preparation of Thermoplastic Elastomers
Source: Preprints.org preprint supplement (doi:10.20944/preprints202107.0677.v1), 2021-07-30
Supplement: Supplementary file 2 [file supplementary]

Supporting Information

Heterogeneous double metal cyanide catalyzed synthesis of poly(ε-caprolactone) polyols for the preparation of thermoplastic elastomers

Chinh Hoang Tran, Min Woong Lee, Sang Woo Park, Jae Eon Jeong, Soo Jeong Lee, Wenliang Song, PilHo Huh*, and Il Kim*

Department of Polymer Science and Engineering, Pusan National University, Busandaehag-ro 63-2, Geumjeong-gu, Busan 46241, Republic of Korea.
***** Correspondence: IK: ilkim@pusan.ac.kr; PH: pilho.huh@pusan.ac.kr

**Table of Contents**

[**Table of Contents** S2](#_Toc74579357)

[**1. Supplementary figures** S6](#_Toc74579358)

[**1.1 Characterization of DMC catalysts** S6](#_Toc74579359)

[**Fig. S1** Characterization of the DMC catalysts used in this work. (a) FTIR spectra, (b) XPS spectra, and (c) XRD patterns. S6](#_Toc74579360)

[**1.2 Polymerization of lactones** S7](#_Toc74579361)

[**Fig. S2** 1H NMR spectrum (400 MHz, CDCl3) of the crude reaction mixture of CL without using initiator after 24 h. Conditions: DMC-EAA = 10 mg ([*Zn*]0 = 30 × 10−3 M), [*CL*]0 = 9M, *Tp* = 120 °C. S7](#_Toc74579362)

[**Fig. S3** 1H NMR spectrum (400 MHz, CDCl3) of the crude reaction mixture of CL polymerization using PPG400 initiator (run 1 of **Table 1**). Conditions: DMC-EAA = 10 mg ([*Zn*]0 = 30 × 10−3 M), [*CL*]0 = 9M, [*CL*]0/[*PPG400*]0 = 10, *Tp* = 120 °C. S7](#_Toc74579363)

[**Fig. S4** 1H NMR spectrum (400 MHz, CDCl3) of the crude reaction mixture of CL polymerization using EG initiator (run 2 of **Table 1**). Conditions: DMC-EAA = 10 mg ([*Zn*]0 = 30 × 10−3 M), [*CL*]0 = 9M, [*CL*]0/[*EG*]0 = 10, *Tp* = 120 °C. S8](#_Toc74579364)

[**Fig. S5** 1H NMR spectrum (400 MHz, CDCl3) of the crude reaction mixture of CL polymerization using PG initiator (run 3 of **Table 1**). Conditions: DMC-EAA = 10 mg ([*Zn*]0 = 30 × 10−3 M), [*CL*]0 = 9M, [*CL*]0/[*PG*]0 = 10, *Tp* = 120 °C. S8](#_Toc74579365)

[**Fig. S6** 1H NMR spectrum (400 MHz, CDCl3) of the crude reaction mixture of CL polymerization using GL initiator (run 4 of **Table 1**). Conditions: DMC-EAA = 10 mg ([*Zn*]0 = 30 × 10−3 M), [*CL*]0 = 9M, [*CL*]0/[*GL*]0 = 10, *Tp* = 120 °C. S9](#_Toc74579366)

[**Fig. S7** 1H NMR spectrum (400 MHz, CDCl3) of the crude reaction mixture of CL polymerization using EG initiator (run 6 of **Table 1**). Conditions: DMC-TBA = 10 mg ([*Zn*]0 = 30 × 10−3 M), [*CL*]0 = 9M, [*CL*]0/[*I*]0 = 10, *Tp* = 160 °C. S9](#_Toc74579367)

[**Fig. S8** 1H NMR spectrum (400 MHz, CDCl3) of the crude reaction mixture of CL polymerization using EG initiator (run 7 of **Table 1**). Conditions: DMC-IBN = 10 mg ([*Zn*]0 = 30 × 10−3 M), [*CL*]0 = 9M, [*CL*]0/[*I*]0 = 10, *Tp* = 160 °C. S10](#_Toc74579368)

[**Fig. S9** 1H NMR spectrum (400 MHz, CDCl3) of the PCL produced by SB initiator (run 10 of **Table 1**). Conditions: DMC-EAA = 10 mg ([*Zn*]0 = 30 × 10−3 M), [*CL*]0 = 9M, [*CL*]0/[*I*]0 = 10, *Tp* = 120 °C. S10](#_Toc74579369)

[**Fig. S10** GPC curves of the resultant PCLs using different initiators (run 1–4 of **Table 1**). Conditions: DMC-EAA = 10 mg ([*Zn*]0 = 30 × 10−3 M), [*M*]0 = 9M, [*M*]0/[*I*]0 = 10, *Tp* = 120 °C. S11](#_Toc74579370)

[**Fig. S11** MALDI-TOF MS spectrum of PG-PCL (**Table 1**, run 5). Conditions: DMC-EAA = 10 mg ([*Zn*]0 = 30 × 10−3 M), [*M*]0 = 9M, [*M*]0/[*PG*]0 = 10, *Tp* = 160 °C. S11](#_Toc74579371)

[**Fig. S12** MALDI-TOF MS spectrum of GL-PCL (**Table 1**, run 6). Conditions: DMC-EAA = 10 mg ([*Zn*]0 = 30 × 10−3 M), [*M*]0 = 9M, [*M*]0/[*GL*]0 = 10, *Tp* = 160 °C. S12](#_Toc74579372)

[**Fig. S13** MALDI-TOF MS spectrum of SB-PCL (**Table 1**, run 7). Conditions: DMC-EAA = 10 mg ([*Zn*]0 = 30 × 10−3 M), [*M*]0 = 9M, [*M*]0/[*SB*]0 = 10, *Tp* = 160 °C. S12](#_Toc74579373)

[**Fig. S14** Recycling experiment of the ROP of CL using DMC-EAA catalyst. S13](#_Toc74579374)

[**Fig. S15** GPC curves of the PCLs obtained using various amount of PG initiator. Condition: DMC-EAA = 10 mg ([*Zn*]0 = 30 × 10−3 M), [*CL*]0 = 9M, reaction temperature: 160 °C. S13](#_Toc74579375)

[**Fig. S16** GPC curves of the PCLs obtained using various amount of GL initiator. Condition: DMC-EAA = 10 mg ([*Zn*]0 = 30 × 10−3 M), [*CL*]0 = 9M, reaction temperature: 160 °C. S14](#_Toc74579376)

[**Fig. S17** GPC curves of the resultant PCLs using different ILs. Conditions: DMC-EAA = 10 mg ([*Zn*]0 = 30 × 10−3 M), [*CL*]0 = 9M, [*CL*]0/[*GL*]0 = 10, [*IL*]0/[*Zn*]0 = 2.5, *Tp* = 160 °C. S14](#_Toc74579377)

[**Fig. S18** GPC curves of the resultant PCLs using various amount of PG in the presence of BMIMCl (IL). Conditions: DMC-EAA = 10 mg [*Zn*]0 = 30 × 10−3 M), [*CL*]0 = 9M, [*IL*]0/[*Zn*]0 = 2.5, *Tp* = 160 °C. S15](#_Toc74579378)

[**Fig. S19** GPC curves of the resultant PCLs using various amount of GL in the presence of BMIMCl (IL). Conditions: DMC-EAA = 10 mg ([*Zn*]0 = 30 × 10−3 M), [*CL*]0 = 9M, [*IL*]0/[*Zn*]0 = 2.5, *Tp* = 160 °C. S15](#_Toc74579379)

[**Fig. S20** GPC curves of the resultant PCLs using various amount of BMIMCl (IL). Conditions: DMC-EAA = 10 mg ([*Zn*]0 = 30 × 10−3 M), [*CL*]0 = 9M, [*CL*]0/[*PG*]0 = 10, *Tp* = 160 °C. S16](#_Toc74579380)

[**1.3 Kinetic Studies** S17](#_Toc74579381)

[**Fig. S21** 1H NMR (400 MHz, CD3OD) spectra of the PCL collected at different intervals. Conditions: DMC-EAA = 10 mg ([*Zn*]0 = 30 × 10−3 M), [*CL*]0 = 9M, [*CL*]0/[*GL*]0 = 20, *T*p= 130 °C. Dashed lines denote the monomer signals. S17](#_Toc74579382)

[**Fig. S22** 1H NMR (400 MHz, CD3OD) spectra of the PCL collected at different intervals. Conditions: DMC-EAA = 10 mg ([*Zn*]0 = 30 × 10−3 M), [*CL*]0 = 9M, [*CL*]0/[*GL*]0 = 20, *Tp* = 140 °C. Dash lines denote the monomer signals. S17](#_Toc74579383)

[**Fig. S23** 1H NMR (400 MHz, CDCl3) spectra of the PCL collected at different intervals. Conditions: DMC-EAA = 10 mg ([*Zn*]0 = 30 × 10−3 M), [*CL*]0 = 9M, [*CL*]0/[*GL*]0 = 20, *Tp* = 150 °C. Dash lines denote the monomer signals. S18](#_Toc74579384)

[**Fig. S24** 1H NMR (400 MHz, CDCl3) spectra of the PCL collected at different intervals. Conditions: DMC-EAA = 10 mg ([*Zn*]0 = 30 × 10−3 M), [*CL*]0 = 9M, [*CL*]0/[*GL*]0 = 20, *Tp* = 160 °C. Dash lines denote the monomer signals. S18](#_Toc74579385)

[**Fig. S25** 1H NMR (400 MHz, CDCl3) spectra of the PCL collected at different intervals. Conditions: DMC-EAA = 10 mg ([*Zn*]0 = 30 × 10−3 M), [*CL*]0 = 9M, [*CL*]0/[*SB*]0 = 20, *Tp* = 160 °C. Dash lines denote the monomer signals. S19](#_Toc74579386)

[**Fig. S26** GPC curves of PCL collected at different intervals. Conditions: DMC-EAA = 10 mg ([*Zn*]0 = 30 × 10−3 M), [*CL*]0 = 9M, [*CL*]0/[*GL*]0 = 20, *Tp* = 140 °C. S20](#_Toc74579387)

[**Fig. S27** Plots of *M*n and *Ð* versus (a) monomer conversion (*x*p) and (b) polymerization time in **Fig. S26**. S20](#_Toc74579388)

[**Fig. S28** GPC curves of PCL collected at different intervals. Conditions: DMC-EAA = 10 mg ([*Zn*]0 = 30 × 10−3 M), [*CL*]0 = 9M, [*CL*]0/[*GL*]0 = 20, *Tp* = 150 °C. S21](#_Toc74579389)

[**Fig. S29** Plots of *M*n and *Ð* versus (a) monomer conversion (*x*p) and (b) polymerization time in **Fig. S28**. S21](#_Toc74579390)

[**Fig. S30** GPC curves of PCL collected at different intervals. Conditions: DMC-EAA = 10 mg ([*Zn*]0 = 30 × 10−3 M), [*CL*]0 = 9M, [*CL*]0/[*GL*]0 = 20, *Tp* = 160 °C. S22](#_Toc74579391)

[**Fig. S31** Plots of *M*n and *Ð* versus (a) monomer conversion (*x*p) and (b) polymerization time in **Fig. S30**. S22](#_Toc74579392)

[**1.4 Copolymerization of CL with Glycidol** S23](#_Toc74579393)

[**Fig. S32** 1H NMR spectrum (400 MHz, CDCl3) of the copolymerization of CL with glycidol (G) in CDCl3. Condition: DMC-EAA = 10 mg ([*Zn*]0 = 30 × 10−3 M), [*CL*]0 = 9M, [*CL*]0/[*G*]0 = 7 : 3, *Tp* = 160 °C. S23](#_Toc74579394)

[**Fig. S33** 1H NMR spectrum (400 MHz, CDCl3) of the copolymerization of CL with glycidol (G) in CDCl3. Condition: DMC-EAA = 10 mg ([*Zn*]0 = 30 × 10−3 M), [*CL*]0 = 9M, [*CL*]0/[*G*]0 = 6 : 4, *Tp* = 160 °C. S23](#_Toc74579395)

[**Fig. S34** 1H NMR spectrum (400 MHz, CDCl3) of the copolymerization of CL with glycidol (G) in CDCl3. Condition: DMC-EAA = 10 mg ([*Zn*]0 = 30 × 10−3 M), [*CL*]0 = 9M, [*CL*]0/[*G*]0 = 5 : 5, *Tp* = 160 °C. S24](#_Toc74579396)

[**Fig. S35** 2D NMR spectra (400 MHz, CDCl3) of the copolymerization of CL with glycidol (G) in CDCl3. Condition: DMC-EAA = 10 mg ([*Zn*]0 = 30 × 10−3 M), [*CL*]0 = 9M, [*CL*]0/[*G*]0 = 6 : 4, *Tp* = 160 °C. S24](#_Toc74579397)

[**Fig. S36** 13C NMR spectra (400 MHz, CDCl3) of the PCL (top) and branched PCL (bottom) obtained from the copolymerization of CL with glycidol (G). Condition: DMC-EAA = 10 mg ([*Zn*]0 = 30 × 10−3 M), [*CL*]0 = 9M, [*CL*]0/[*G*]0 = 7 : 3, *Tp* = 160 °C. S25](#_Toc74579398)

[**Fig. S37** 1H NMR (400 MHz, CDCl3) spectra of the copolymerization of CL with glycidol (G) collected at different intervals. Conditions: DMC-EAA = 10 mg ([*Zn*]0 = 30 × 10−3 M), [*CL*]0 = 9M, [*CL*]0/[*G*]0 = 5/5, *Tp* = 160 °C. S25](#_Toc74579399)

[**Fig. S38** GPC curves of the resultant copolymers obtained from the copolymerization of CL and glycidol (G). Condition: DMC-EAA = 10 mg ([*Zn*]0 = 30 × 10−3 M), [*CL*]0 = 9M, *Tp* = 160 °C. S26](#_Toc74579400)

[**1.5 Synthesis of TPEs and TPUs** S27](#_Toc74579401)

[**Fig. S39** 1H-NMR spectrum of the PCL-TPE-1 produced by EG-PCL-1000 diol. S27](#_Toc74579402)

[**Fig. S40** 1H-NMR spectrum of the PCL-TPE-3 produced by PG-PCL-1000 diol. S27](#_Toc74579403)

[**Fig. S41** 1H-NMR spectrum of the TPEE produced by PTMEG-1000 diol. S28](#_Toc74579404)

[**Fig. S42** 1H-NMR spectrum of the PCL-TPU produced by PG-PCL-1000 diol. S28](#_Toc74579405)

[**Fig. S43** 1H-NMR spectrum of the TPU produced by PTMEG-1000 diol. S29](#_Toc74579406)

[**Fig. S44** FTIR spectra of the TPU and PCL-TPU produced by PTMEG-1000 and PG-PCL-1000 diols, respectively. S29](#_Toc74579407)

[**Fig. S45** (a) TGA and (b) DTG curves for TPEE, PCL-TPE-1, and PCL-TPE-3 produced by PTMEG-1000, EG-PCL-1000, and PG-PCL-1000 diols, respectively. S30](#_Toc74579408)

[**Fig. S46** (a) TGA and (b) DTG curves for TPU and PCL-TPU produced by PTMEG-1000 and PG-PCL-1000 diols, respectively. S30](#_Toc74579409)

[**Fig. S47** DSC curves for TPEE, PCL-TPE-1, and PCL-TPE-3 produced by PTMEG-1000, EG-PCL-1000, and PG-PCL-1000 diols, respectively: (a) during cooling from melt, (b) during second heating run. S31](#_Toc74579410)

[**Fig. S48** DSC curves for TPU and PCL-TPU produced by PTMEG-1000 and PG-PCL-1000 diols, respectively during second heating run. S31](#_Toc74579411)

[**Fig. S49** Stress–strain curves for PCL-TPEs produced by PG-PCL diols with different molecular weights conducted at a crosshead speed of 100 mm min−1 (**Table 5**). S32](#_Toc74579412)

[**2. Supplementary Schemes** S33](#_Toc74579413)

[**Scheme S1** Proposed mechanism for the copolymerization of CL and glycidol using DMC catalyst. S33](#_Toc74579414)

[**Scheme S2** Synthesis of PCL-TPEs using PCL diols. S33](#_Toc74579415)

[**Scheme S3** Synthesis of PCL-TPU using PG-PCL diol. S34](#_Toc74579416)

[**3. Supplementary tables** S35](#_Toc74579417)

[**Table S1** Results of the batch ROP of CL by DMC catalyst using various amount of PG and BMIMCl (*IL*)a S35](#_Toc74579418)

[**Table S2** Results of the batch ROP of CL in IL by DMC catalyst using various amount of GLa S36](#_Toc74579419)

# **1. Supplementary figures**

**1.1 Characterization of DMC catalysts**

**Fig. S1** Characterization of the DMC catalysts used in this work. (a) FTIR spectra, (b) XPS spectra, and (c) XRD patterns.

## **1.2 Polymerization of lactones**

**Fig. S2** 1H NMR spectrum (400 MHz, CDCl3) of the crude reaction mixture of CL without using initiator after 24 h. Conditions: DMC-EAA = 10 mg ([*Zn*]0 = 30 × 10−3 M), [*CL*]0 = 9M, *Tp* = 120 °C.

**Fig. S3** 1H NMR spectrum (400 MHz, CDCl3) of the crude reaction mixture of CL polymerization using PPG400 initiator (run 1 of **Table 1**). Conditions: DMC-EAA = 10 mg ([*Zn*]0 = 30 × 10−3 M), [*CL*]0 = 9M, [*CL*]0/[*PPG400*]0 = 10, *Tp* = 120 °C.

**Fig. S4** 1H NMR spectrum (400 MHz, CDCl3) of the crude reaction mixture of CL polymerization using EG initiator (run 2 of **Table 1**). Conditions: DMC-EAA = 10 mg ([*Zn*]0 = 30 × 10−3 M), [*CL*]0 = 9M, [*CL*]0/[*EG*]0 = 10, *Tp* = 120 °C.

**Fig. S5** 1H NMR spectrum (400 MHz, CDCl3) of the crude reaction mixture of CL polymerization using PG initiator (run 3 of **Table 1**). Conditions: DMC-EAA = 10 mg ([*Zn*]0 = 30 × 10−3 M), [*CL*]0 = 9M, [*CL*]0/[*PG*]0 = 10, *Tp* = 120 °C.

**Fig. S6** 1H NMR spectrum (400 MHz, CDCl3) of the crude reaction mixture of CL polymerization using GL initiator (run 4 of **Table 1**). Conditions: DMC-EAA = 10 mg ([*Zn*]0 = 30 × 10−3 M), [*CL*]0 = 9M, [*CL*]0/[*GL*]0 = 10, *Tp* = 120 °C.

**Fig. S7** 1H NMR spectrum (400 MHz, CDCl3) of the crude reaction mixture of CL polymerization using EG initiator (run 6 of **Table 1**). Conditions: DMC-TBA = 10 mg ([*Zn*]0 = 30 × 10−3 M), [*CL*]0 = 9M, [*CL*]0/[*I*]0 = 10, *Tp* = 160 °C.

**Fig. S8** 1H NMR spectrum (400 MHz, CDCl3) of the crude reaction mixture of CL polymerization using EG initiator (run 7 of **Table 1**). Conditions: DMC-IBN = 10 mg ([*Zn*]0 = 30 × 10−3 M), [*CL*]0 = 9M, [*CL*]0/[*I*]0 = 10, *Tp* = 160 °C.

**Fig. S9** 1H NMR spectrum (400 MHz, CDCl3) of the PCL produced by SB initiator (run 10 of **Table 1**). Conditions: DMC-EAA = 10 mg ([*Zn*]0 = 30 × 10−3 M), [*CL*]0 = 9M, [*CL*]0/[*I*]0 = 10, *Tp* = 120 °C.

**Fig. S10** GPC curves of the resultant PCLs using different initiators (run 1–4 of **Table 1**). Conditions: DMC-EAA = 10 mg ([*Zn*]0 = 30 × 10−3 M), [*M*]0 = 9M, [*M*]0/[*I*]0 = 10, *Tp* = 120 °C.


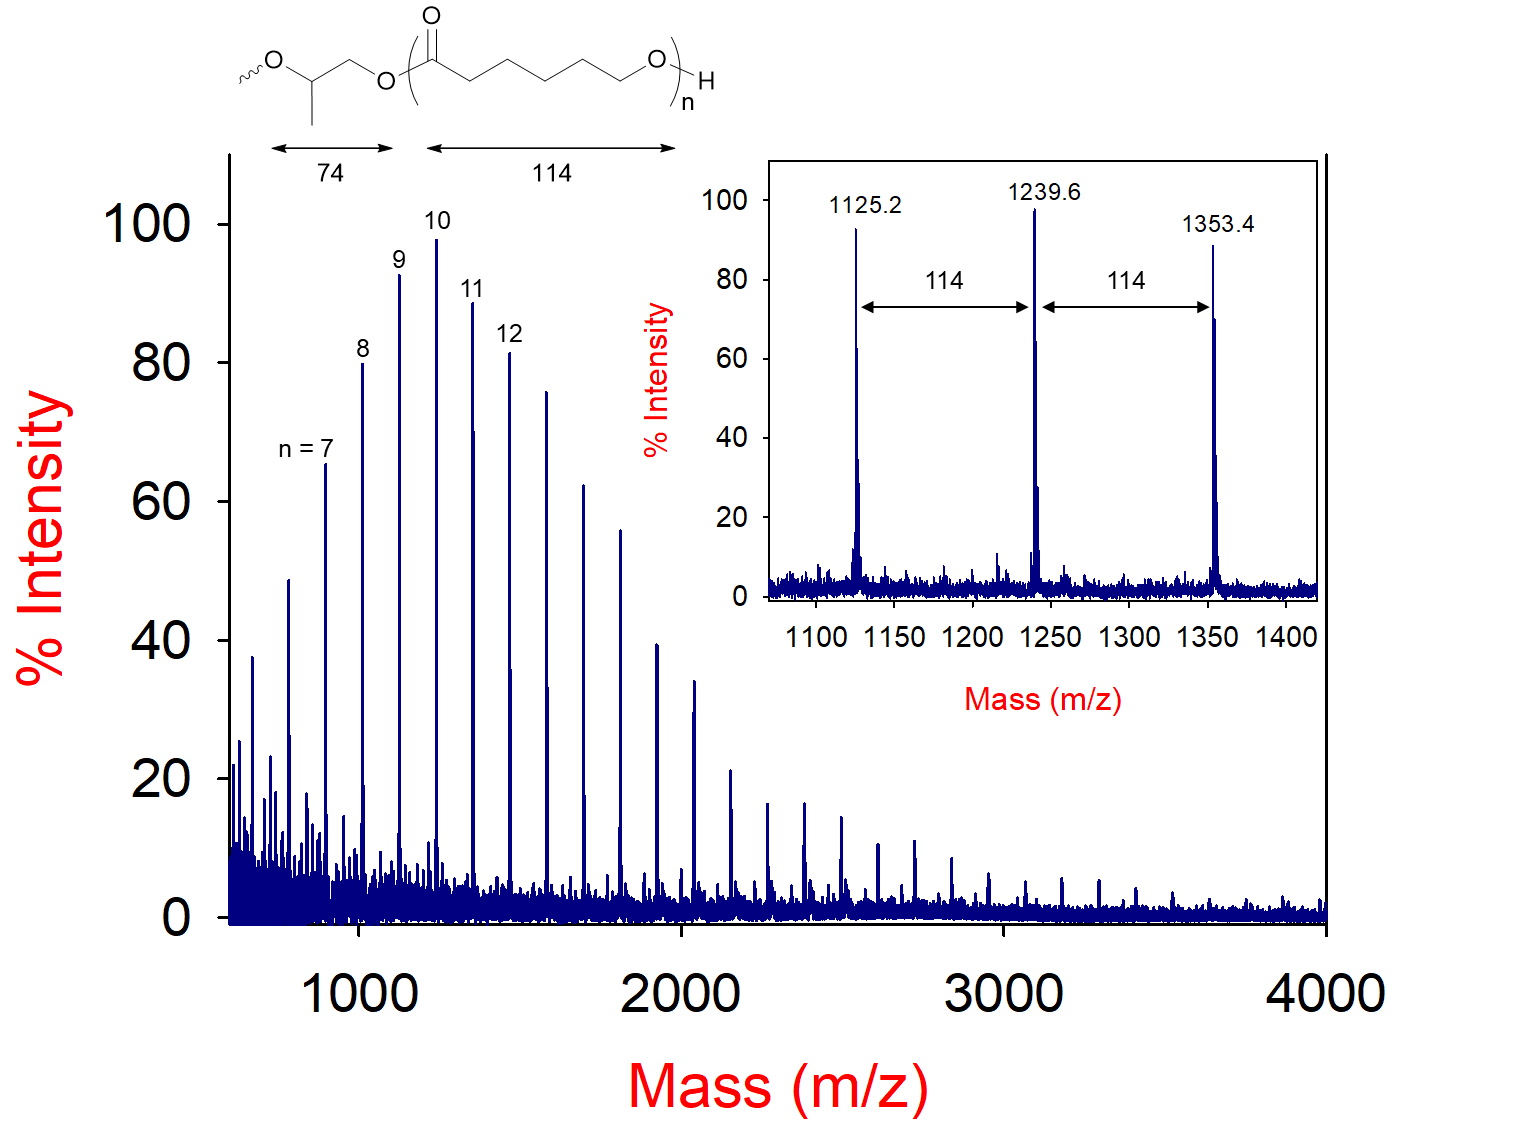


**Fig. S11** MALDI-TOF MS spectrum of PG-PCL (**Table 1**, run 5). Conditions: DMC-EAA = 10 mg ([*Zn*]0 = 30 × 10−3 M), [*M*]0 = 9M, [*M*]0/[*PG*]0 = 10, *Tp* = 160 °C.


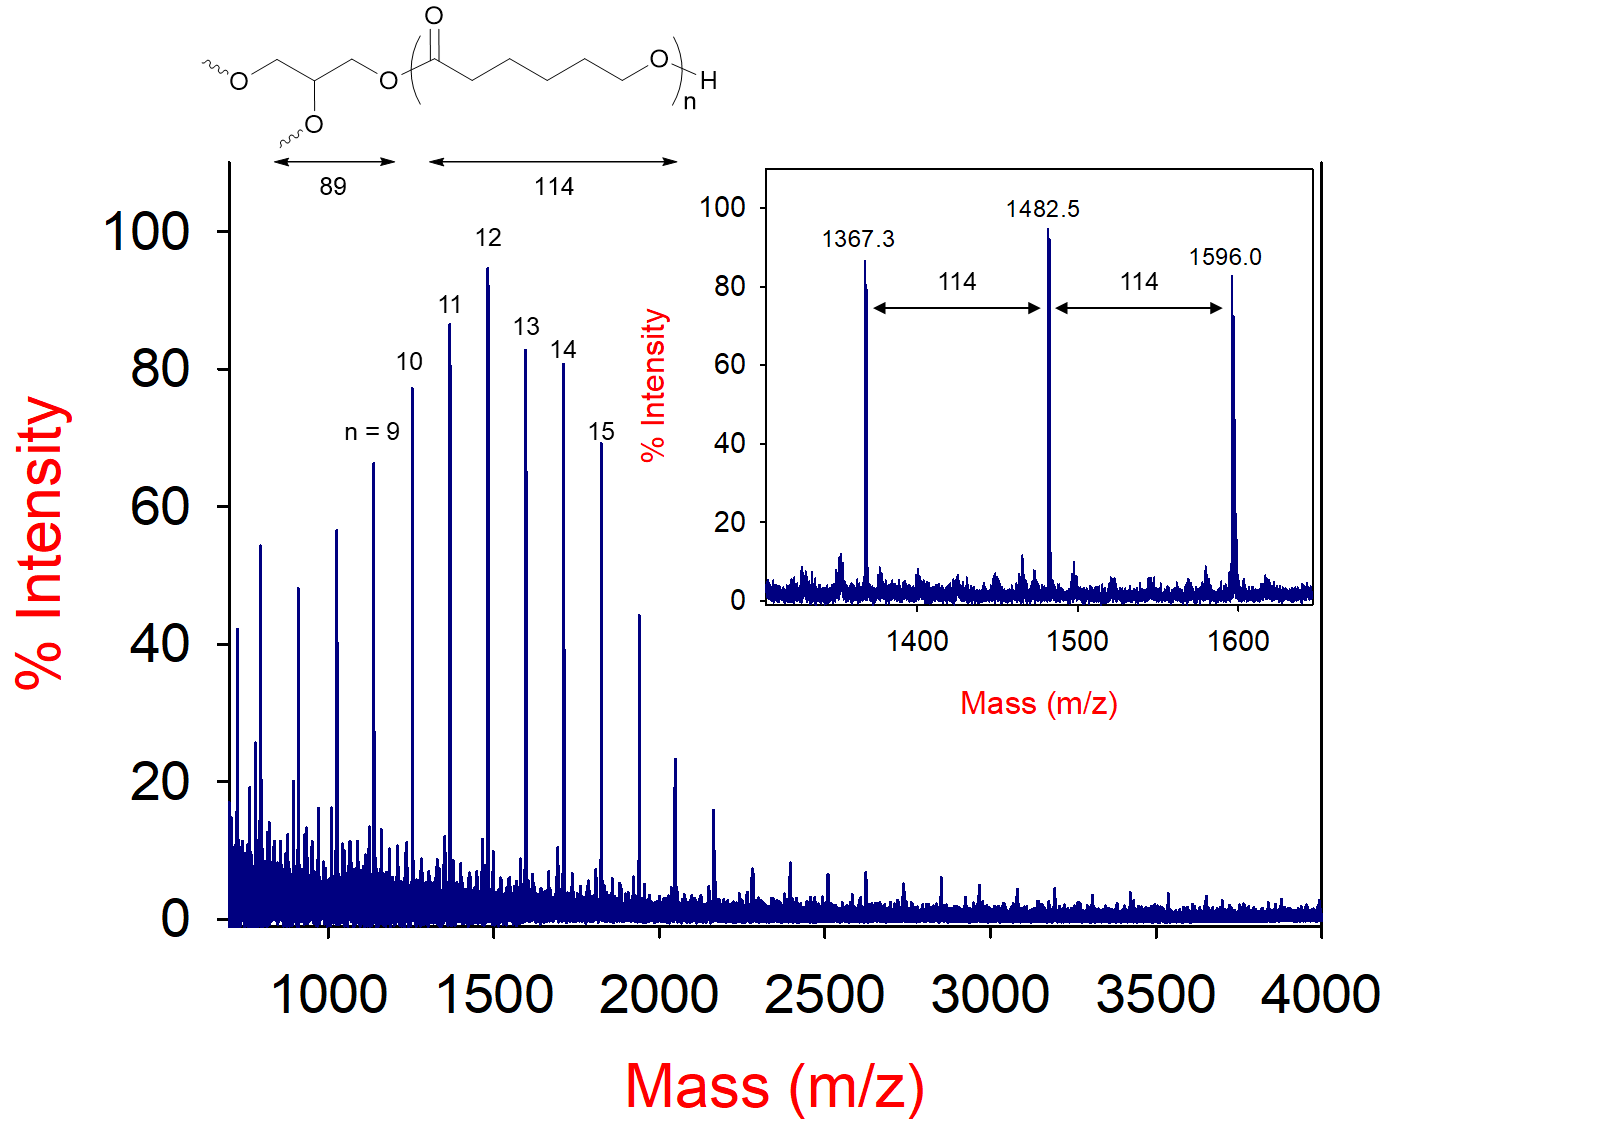


**Fig. S12** MALDI-TOF MS spectrum of GL-PCL (**Table 1**, run 6). Conditions: DMC-EAA = 10 mg ([*Zn*]0 = 30 × 10−3 M), [*M*]0 = 9M, [*M*]0/[*GL*]0 = 10, *Tp* = 160 °C.


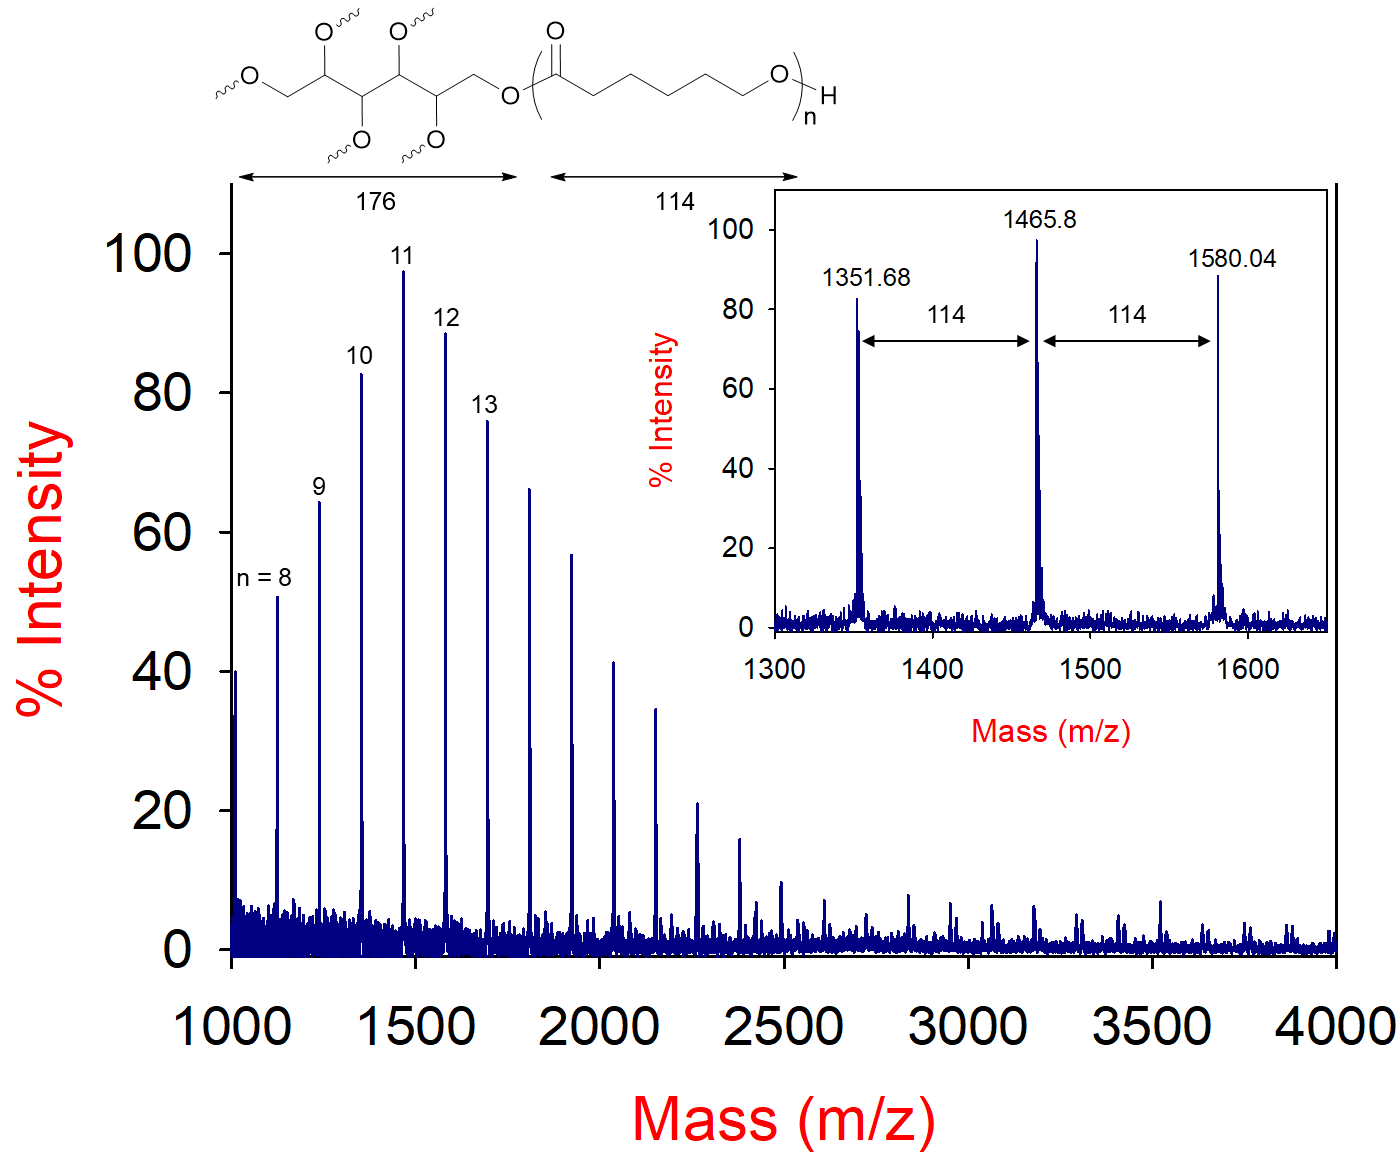


**Fig. S13** MALDI-TOF MS spectrum of SB-PCL (**Table 1**, run 7). Conditions: DMC-EAA = 10 mg ([*Zn*]0 = 30 × 10−3 M), [*M*]0 = 9M, [*M*]0/[*SB*]0 = 10, *Tp* = 160 °C.

**Fig. S14** Recycling experiment of the ROP of CL using DMC-EAA catalyst.

**Fig. S15** GPC curves of the PCLs obtained using various amount of PG initiator. Condition: DMC-EAA = 10 mg ([*Zn*]0 = 30 × 10−3 M), [*CL*]0 = 9M, reaction temperature: 160 °C.

**Fig. S16** GPC curves of the PCLs obtained using various amount of GL initiator. Condition: DMC-EAA = 10 mg ([*Zn*]0 = 30 × 10−3 M), [*CL*]0 = 9M, reaction temperature: 160 °C.

**Fig. S17** GPC curves of the resultant PCLs using different ILs. Conditions: DMC-EAA = 10 mg ([*Zn*]0 = 30 × 10−3 M), [*CL*]0 = 9M, [*CL*]0/[*GL*]0 = 10, [*IL*]0/[*Zn*]0 = 2.5, *Tp* = 160 °C.

**Fig. S18** GPC curves of the resultant PCLs using various amount of PG in the presence of BMIMCl (IL). Conditions: DMC-EAA = 10 mg [*Zn*]0 = 30 × 10−3 M), [*CL*]0 = 9M, [*IL*]0/[*Zn*]0 = 2.5, *Tp* = 160 °C.

**Fig. S19** GPC curves of the resultant PCLs using various amount of GL in the presence of BMIMCl (IL). Conditions: DMC-EAA = 10 mg ([*Zn*]0 = 30 × 10−3 M), [*CL*]0 = 9M, [*IL*]0/[*Zn*]0 = 2.5, *Tp* = 160 °C.

**Fig. S20** GPC curves of the resultant PCLs using various amount of BMIMCl (IL). Conditions: DMC-EAA = 10 mg ([*Zn*]0 = 30 × 10−3 M), [*CL*]0 = 9M, [*CL*]0/[*PG*]0 = 10, *Tp* = 160 °C.

**1.3 Kinetic Studies**

**Fig. S21** 1H NMR (400 MHz, CD3OD) spectra of the PCL collected at different intervals. Conditions: DMC-EAA = 10 mg ([*Zn*]0 = 30 × 10−3 M), [*CL*]0 = 9M, [*CL*]0/[*GL*]0 = 20, *T*p= 130 °C. Dashed lines denote the monomer signals.

**Fig. S22** 1H NMR (400 MHz, CD3OD) spectra of the PCL collected at different intervals. Conditions: DMC-EAA = 10 mg ([*Zn*]0 = 30 × 10−3 M), [*CL*]0 = 9M, [*CL*]0/[*GL*]0 = 20, *Tp* = 140 °C. Dash lines denote the monomer signals.

**Fig. S23** 1H NMR (400 MHz, CDCl3) spectra of the PCL collected at different intervals. Conditions: DMC-EAA = 10 mg ([*Zn*]0 = 30 × 10−3 M), [*CL*]0 = 9M, [*CL*]0/[*GL*]0 = 20, *Tp* = 150 °C. Dash lines denote the monomer signals.

**Fig. S24** 1H NMR (400 MHz, CDCl3) spectra of the PCL collected at different intervals. Conditions: DMC-EAA = 10 mg ([*Zn*]0 = 30 × 10−3 M), [*CL*]0 = 9M, [*CL*]0/[*GL*]0 = 20, *Tp* = 160 °C. Dash lines denote the monomer signals.

**Fig. S25** 1H NMR (400 MHz, CDCl3) spectra of the PCL collected at different intervals. Conditions: DMC-EAA = 10 mg ([*Zn*]0 = 30 × 10−3 M), [*CL*]0 = 9M, [*CL*]0/[*SB*]0 = 20, *Tp* = 160 °C. Dash lines denote the monomer signals.

**Fig. S26** GPC curves of PCL collected at different intervals. Conditions: DMC-EAA = 10 mg ([*Zn*]0 = 30 × 10−3 M), [*CL*]0 = 9M, [*CL*]0/[*GL*]0 = 20, *Tp* = 140 °C.

**Fig. S27** Plots of *M*n and *Ð* versus (a) monomer conversion (*x*p) and (b) polymerization time in **Fig. S26**.

**Fig. S28** GPC curves of PCL collected at different intervals. Conditions: DMC-EAA = 10 mg ([*Zn*]0 = 30 × 10−3 M), [*CL*]0 = 9M, [*CL*]0/[*GL*]0 = 20, *Tp* = 150 °C.

**Fig. S29** Plots of *M*n and *Ð* versus (a) monomer conversion (*x*p) and (b) polymerization time in **Fig. S28**.

**Fig. S30** GPC curves of PCL collected at different intervals. Conditions: DMC-EAA = 10 mg ([*Zn*]0 = 30 × 10−3 M), [*CL*]0 = 9M, [*CL*]0/[*GL*]0 = 20, *Tp* = 160 °C.

**Fig. S31** Plots of *M*n and *Ð* versus (a) monomer conversion (*x*p) and (b) polymerization time in **Fig. S30**.

**1.4 Copolymerization of CL with Glycidol**


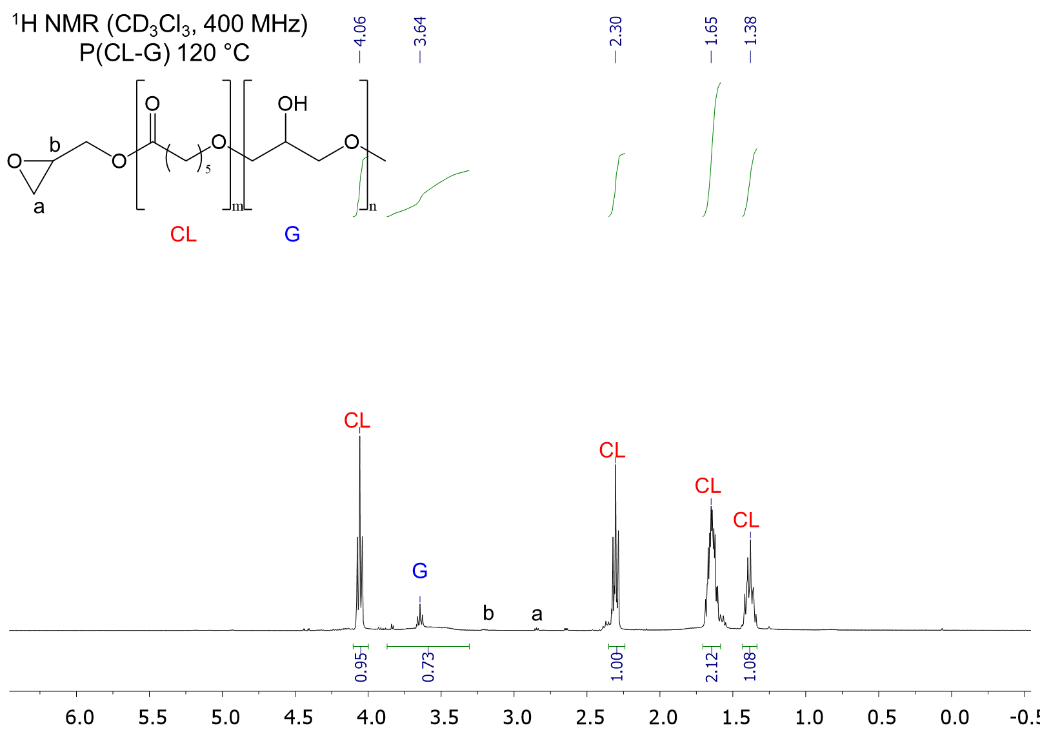


**Fig. S32** 1H NMR spectrum (400 MHz, CDCl3) of the copolymerization of CL with glycidol (G) in CDCl3. Condition: DMC-EAA = 10 mg ([*Zn*]0 = 30 × 10−3 M), [*CL*]0 = 9M, [*CL*]0/[*G*]0 = 7 : 3, *Tp* = 160 °C.


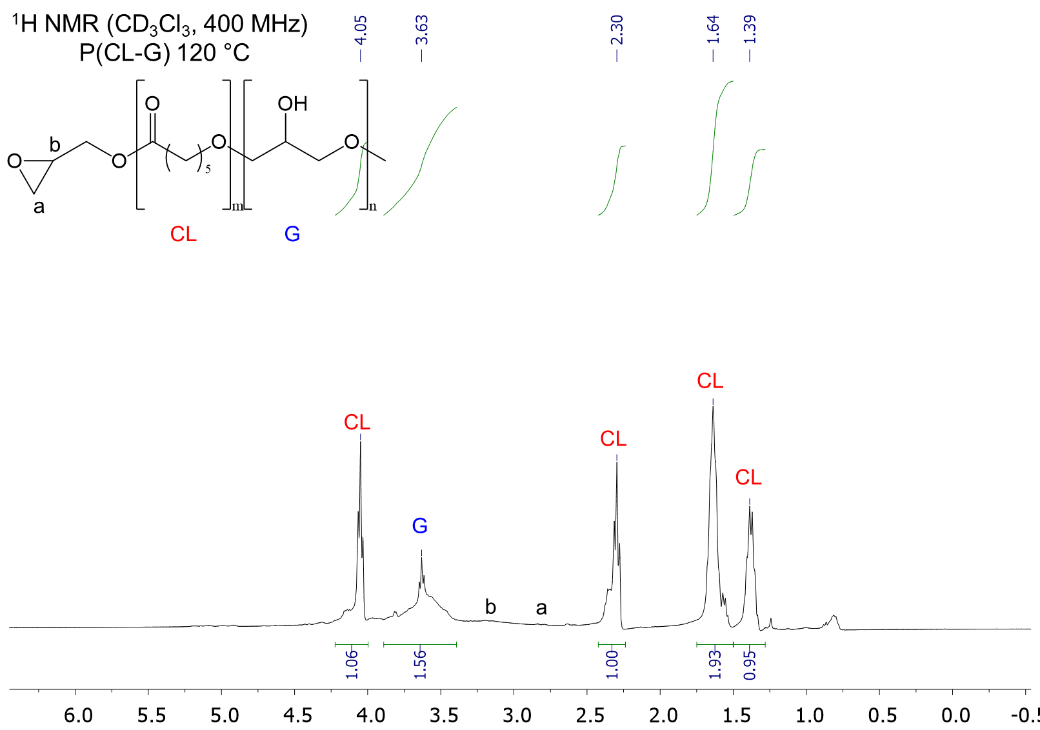


**Fig. S33** 1H NMR spectrum (400 MHz, CDCl3) of the copolymerization of CL with glycidol (G) in CDCl3. Condition: DMC-EAA = 10 mg ([*Zn*]0 = 30 × 10−3 M), [*CL*]0 = 9M, [*CL*]0/[*G*]0 = 6 : 4, *Tp* = 160 °C.


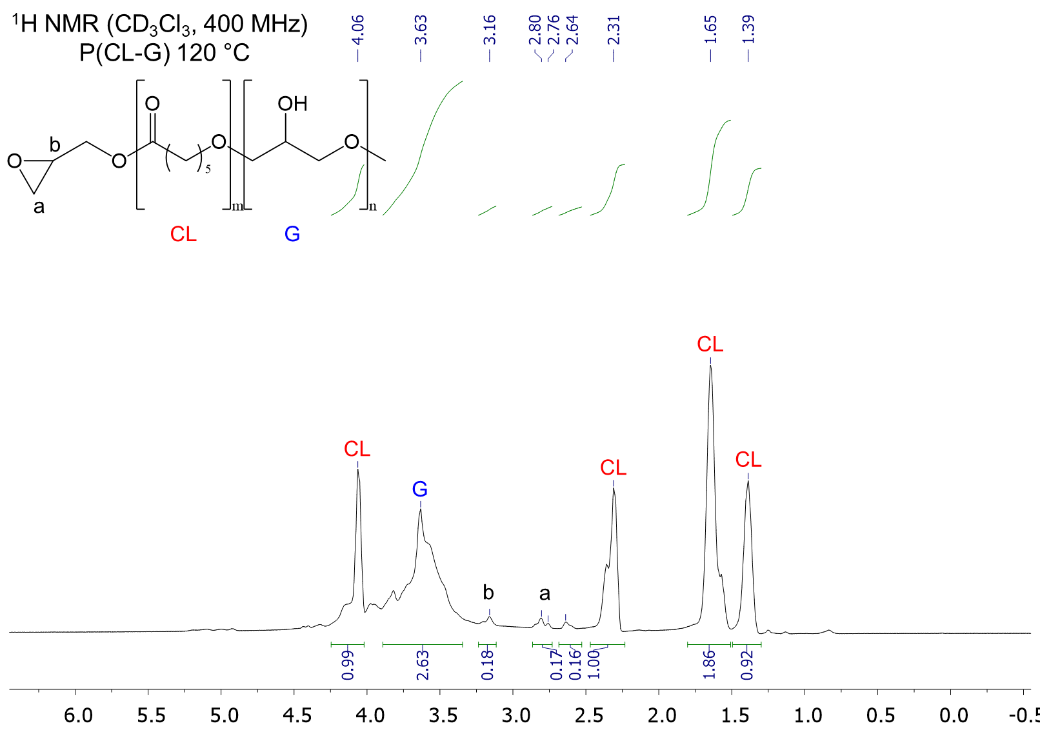


**Fig. S34** 1H NMR spectrum (400 MHz, CDCl3) of the copolymerization of CL with glycidol (G) in CDCl3. Condition: DMC-EAA = 10 mg ([*Zn*]0 = 30 × 10−3 M), [*CL*]0 = 9M, [*CL*]0/[*G*]0 = 5 : 5, *Tp* = 160 °C.

**Fig. S35** 2D NMR spectra (400 MHz, CDCl3) of the copolymerization of CL with glycidol (G) in CDCl3. Condition: DMC-EAA = 10 mg ([*Zn*]0 = 30 × 10−3 M), [*CL*]0 = 9M, [*CL*]0/[*G*]0 = 6 : 4, *Tp* = 160 °C.


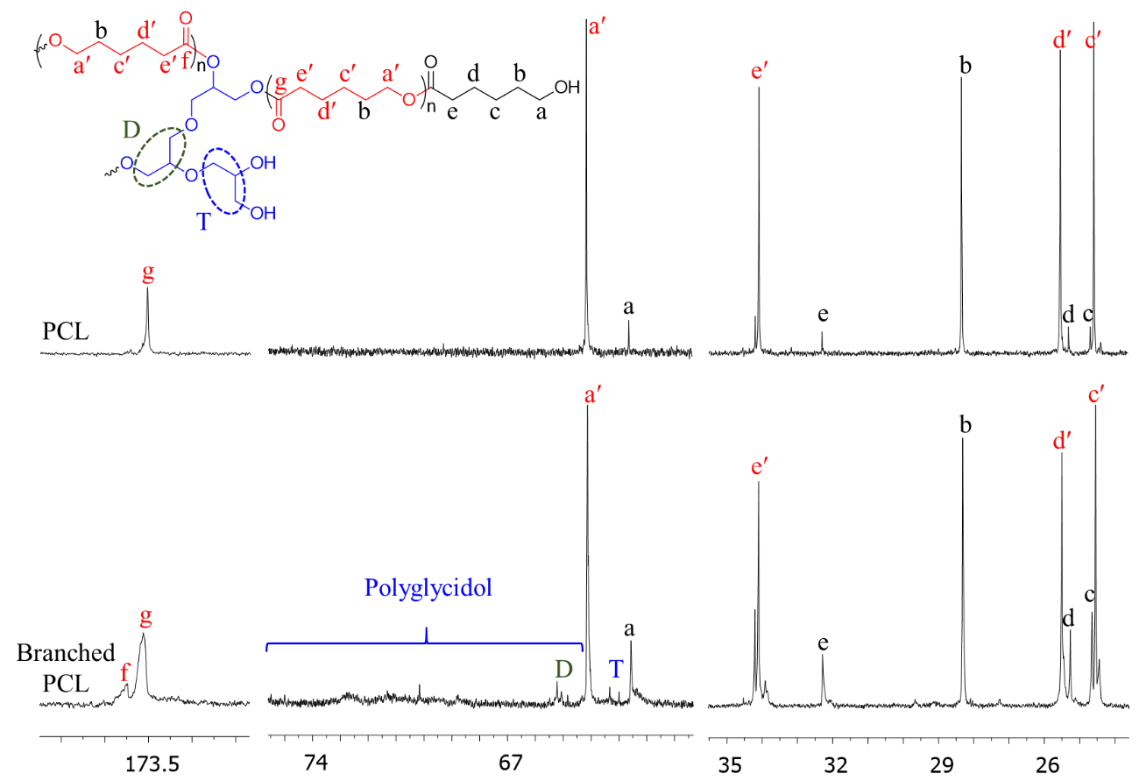


**Fig. S36** 13C NMR spectra (400 MHz, CDCl3) of the PCL (top) and branched PCL (bottom) obtained from the copolymerization of CL with glycidol (G). Condition: DMC-EAA = 10 mg ([*Zn*]0 = 30 × 10−3 M), [*CL*]0 = 9M, [*CL*]0/[*G*]0 = 7 : 3, *Tp* = 160 °C.


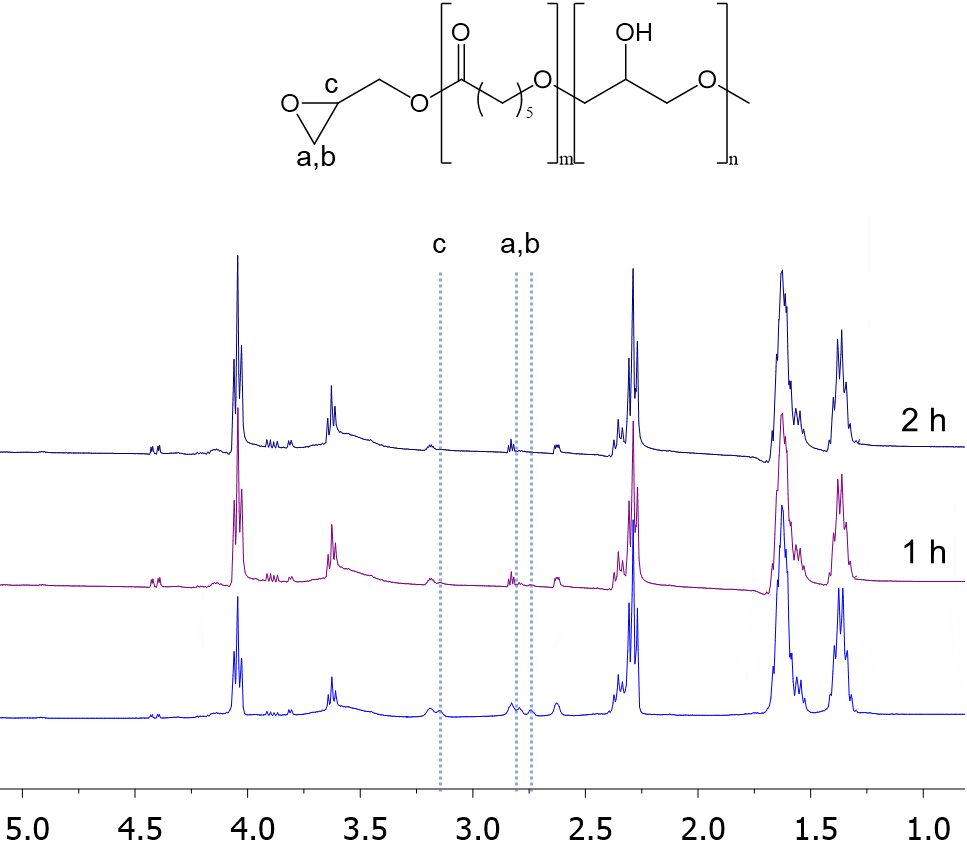


**Fig. S37** 1H NMR (400 MHz, CDCl3) spectra of the copolymerization of CL with glycidol (G) collected at different intervals. Conditions: DMC-EAA = 10 mg ([*Zn*]0 = 30 × 10−3 M), [*CL*]0 = 9M, [*CL*]0/[*G*]0 = 5/5, *Tp* = 160 °C.

**
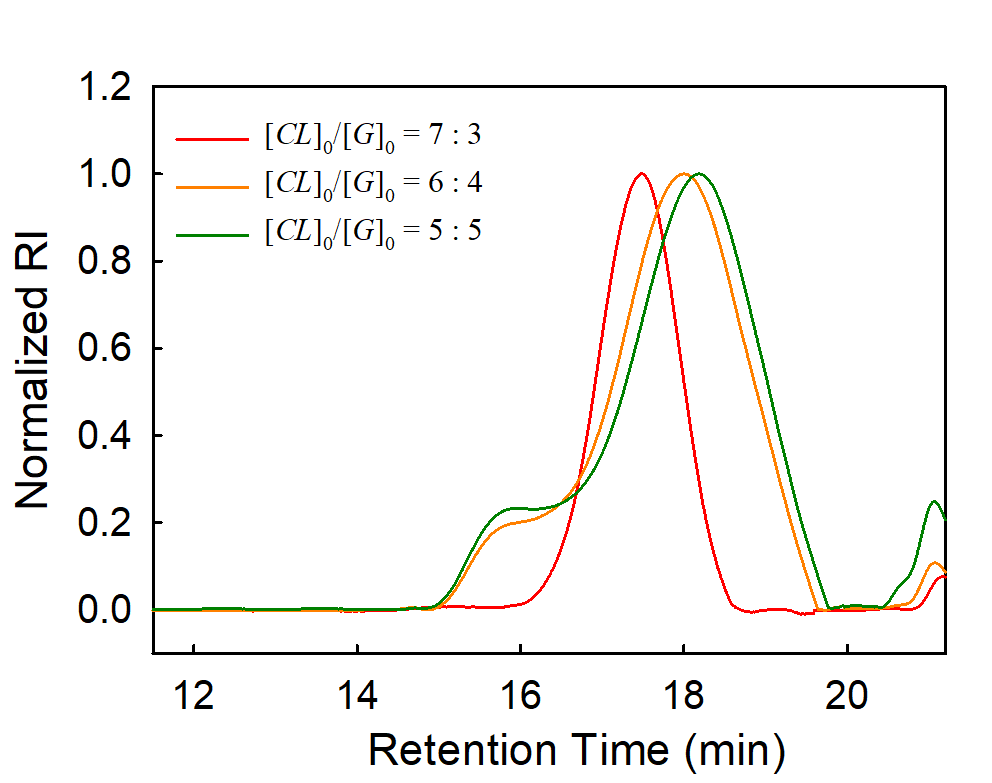
**

**Fig. S38** GPC curves of the resultant copolymers obtained from the copolymerization of CL and glycidol (G). Condition: DMC-EAA = 10 mg ([*Zn*]0 = 30 × 10−3 M), [*CL*]0 = 9M, *Tp* = 160 °C.

**1.5 Synthesis of TPEs and TPUs**

**Fig. S39** 1H-NMR spectrum of the PCL-TPE-1 produced by EG-PCL-1000 diol.

**Fig. S40** 1H-NMR spectrum of the PCL-TPE-3 produced by PG-PCL-1000 diol.

**Fig. S41** 1H-NMR spectrum of the TPEE produced by PTMEG-1000 diol.

**Fig. S42** 1H-NMR spectrum of the PCL-TPU produced by PG-PCL-1000 diol.

**Fig. S43** 1H-NMR spectrum of the TPU produced by PTMEG-1000 diol.

**Fig. S44** FTIR spectra of the TPU and PCL-TPU produced by PTMEG-1000 and PG-PCL-1000 diols, respectively.

**Fig. S45** (a) TGA and (b) DTG curves for TPEE, PCL-TPE-1, and PCL-TPE-3 produced by PTMEG-1000, EG-PCL-1000, and PG-PCL-1000 diols, respectively.

**Fig. S46** (a) TGA and (b) DTG curves for TPU and PCL-TPU produced by PTMEG-1000 and PG-PCL-1000 diols, respectively.

**Fig. S47** DSC curves for TPEE, PCL-TPE-1, and PCL-TPE-3 produced by PTMEG-1000, EG-PCL-1000, and PG-PCL-1000 diols, respectively: (a) during cooling from melt, (b) during second heating run.

**Fig. S48** DSC curves for TPU and PCL-TPU produced by PTMEG-1000 and PG-PCL-1000 diols, respectively during second heating run.

**Fig. S49** Stress–strain curves for PCL-TPEs produced by PG-PCL diols with different molecular weights conducted at a crosshead speed of 100 mm min−1 (**Table 5**).

**2. Supplementary Schemes**

**Scheme S1** Proposed mechanism for the copolymerization of CL and glycidol using DMC catalyst.

**Scheme S2** Synthesis of PCL-TPEs using PCL diols.

**Scheme S3** Synthesis of PCL-TPU using PG-PCL diol.

**3. Supplementary tables**

**Table S1** Results of the batch ROP of CL by DMC catalyst using various amount of PG and BMIMCl (*IL*)a

| Run | [*IL*]0/[*Zn*]0 | [*CL*]0/[*PG*]0 | *t*b (h) | *xp*c (%) | GPC | |
| --- | --- | --- | --- | --- | --- | --- |
| *Mn* | *Ð* |
| 1 | 2.5 | 100 | 12 | 17 | 3740 | 1.05 |
| 2 | 2.5 | 50 | 10 | 56 | 2500 | 1.07 |
| 3 | 2.5 | 20 | 8 | 62 | 1700 | 1.03 |
| 4 | 2.5 | 10 | 8 | 91 | 1400 | 1.11 |
| 5 | 2.5 | 5 | 8 | 86 | 1100 | 1.01 |
| 6 | 1.25 | 10 | 8 | 58 | 1220 | 1.02 |
| 7 | 3.0 | 10 | 8 | 61 | 1240 | 1.01 |
| 8 | 4.0 | 10 | 8 | 58 | 1310 | 1.02 |
| 9 | 5.0 | 10 | 8 | 84 | 1470 | 1.08 |
| 10 | [*IL*]0d | 10 | 12 | < 3 | – | – |

a Conditions: DMC-EAA = 10 mg ([*Zn*]0 = 30 × 10−3 M); [*CL*]0 = 9M; *Tp* = 160 °C. b Reaction time. c Monomer conversion determined by 1H NMR. d The polymerization was performed in the absence of DMC catalyst.

**Table S2** Results of the batch ROP of CL in IL by DMC catalyst using various amount of GLa

| Run | ILb | [*CL*]0/[*GL*]0 | *t*c (h) | *xp*d (%) | GPC | |
| --- | --- | --- | --- | --- | --- | --- |
| *Mn* | *Ð* |
| 1 | BMIMCl | 100 | 12 | 31 | 4050 | 1.01 |
| 2 | BMIMCl | 50 | 10 | 65 | 2750 | 1.02 |
| 3 | BMIMCl | 20 | 8 | 89 | 2520 | 1.07 |
| 4 | BMIMCl | 10 | 8 | 95 | 1730 | 1.11 |
| 5 | BMIMCl | 5 | 8 | 95 | 1280 | 1.06 |
| 6 | TMAP | 10 | 8 | 24 | 1900 | 1.16 |
| 7 | TEAB | 10 | 8 | 29 | 2340 | 1.32 |
| 8 | TDAB | 10 | 8 | 29 | 2510 | 1.26 |

a Conditions: DMC-EAA = 10 mg ([*Zn*]0 = 30 × 10−3 M); [*CL*]0 = 9M; *Tp* = 160 °C. b Ionic liquid: [*IL*]0/[*Zn*]0 = 2.5. c Reaction time. d Monomer conversion determined by 1H NMR.
